# Supplementary material for: Cation modulating electrocatalyst derived from bimetallic metal–organic frameworks for overall water splitting
Source: Royal Society of Chemistry journal article supplement (doi:10.1039/c7ta00692f), 2017-01-01
Supplement: c7ta00692f1.pdf [file c7ta00692f1.pdf]

## Supporting Information

---

### **Cation Modulation Beneficial Electrocatalyst Derived from Bimetallic Metal-organic Frameworks for Overall Water Splitting**

Yang Wang,<sup>1,2</sup> Wenting Wu,<sup>1</sup> Yuan Rao,<sup>1</sup> Zhongtao Li,<sup>1</sup> Noritatsu Tsubaki,<sup>\*,2</sup> Mingbo Wu<sup>\*,1</sup>

<sup>1</sup>State Key Laboratory of Heavy Oil Processing, College of Chemical Engineering, China University of Petroleum, Qingdao 266580, China

<sup>2</sup>Department of Applied Chemistry, Graduate School of Engineering, University of Toyama, Gofuku 3190, Toyama 930-8555, Japan

\*E-mail: tsubaki@eng.u-toyama.ac.jp (N. Tsubaki). Tel/Fax: (+81)-76-445-6846.

\*E-mail: wumb@upc.edu.cn (M.B. Wu). Tel: (+86) 532-86983452. Fax: (+86) 532-86981787.

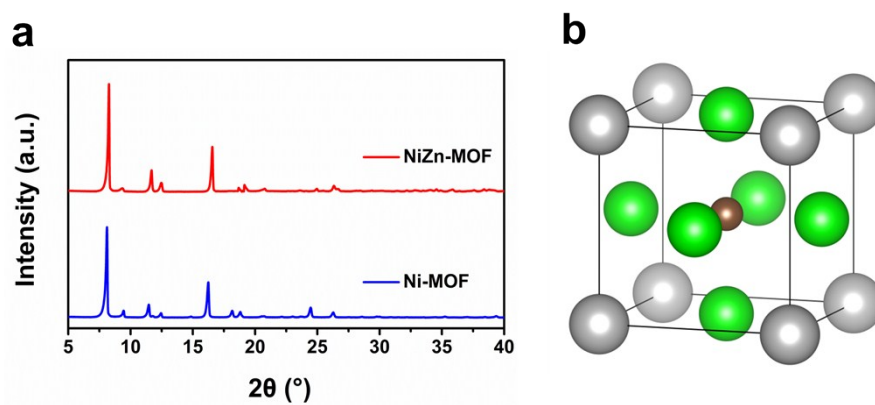

**Fig. S1** (a)XRD patterns of Ni-MOF and bimetallic NiZn-MOF. (b) Cubic crystalline structure of  $\text{Ni}_3\text{ZnC}_{0.7}$ .

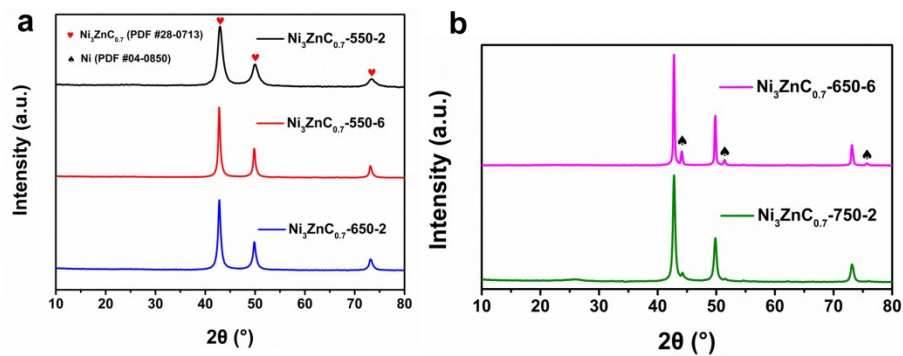

**Fig. S2** (a) and (b) XRD patterns of catalysts prepared at different temperature (2 h and 6 h).

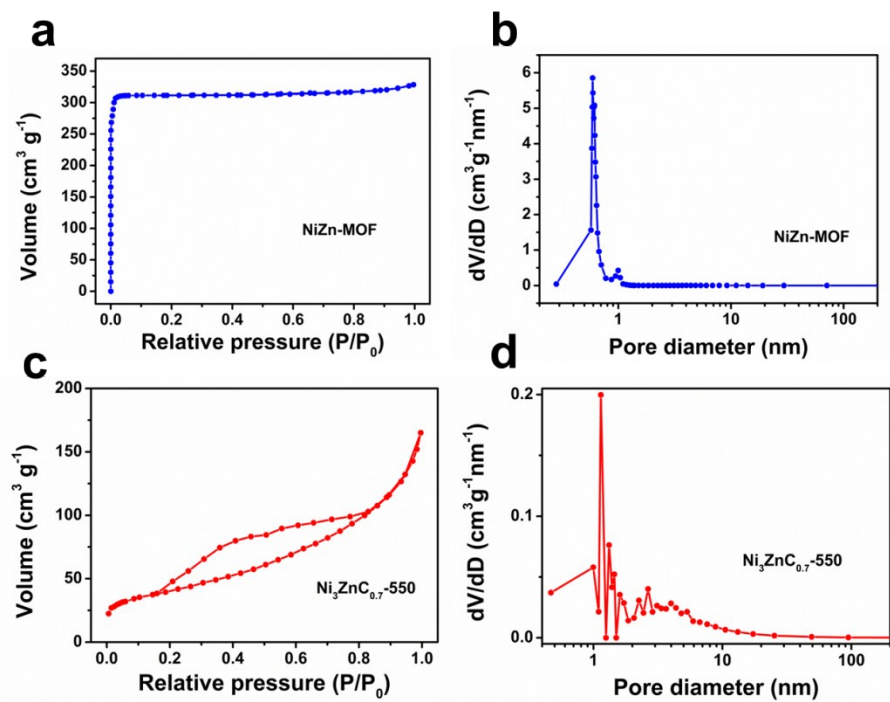

**Fig. S3** N<sub>2</sub> adsorption and desorption isotherms of NiZn-MOF (a) and Ni<sub>3</sub>ZnC<sub>0.7</sub>-550 (c), pore size distribution of NiZn-MOF (b) and Ni<sub>3</sub>ZnC<sub>0.7</sub>-550 (d).

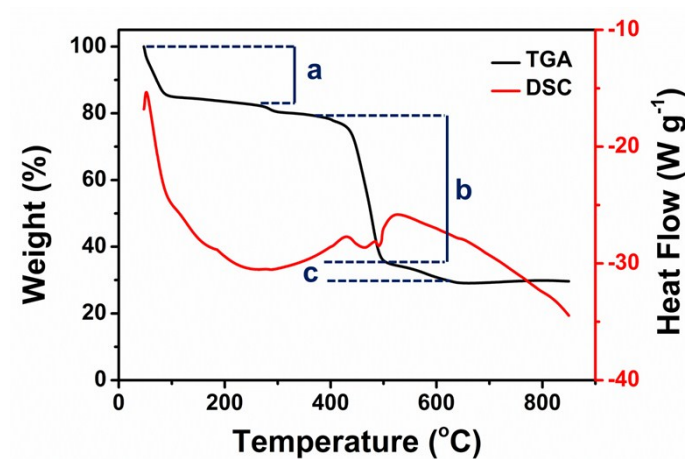

**Fig. S4** TGA-DSC curves of NiZn-MOF measured in N<sub>2</sub> atmosphere.

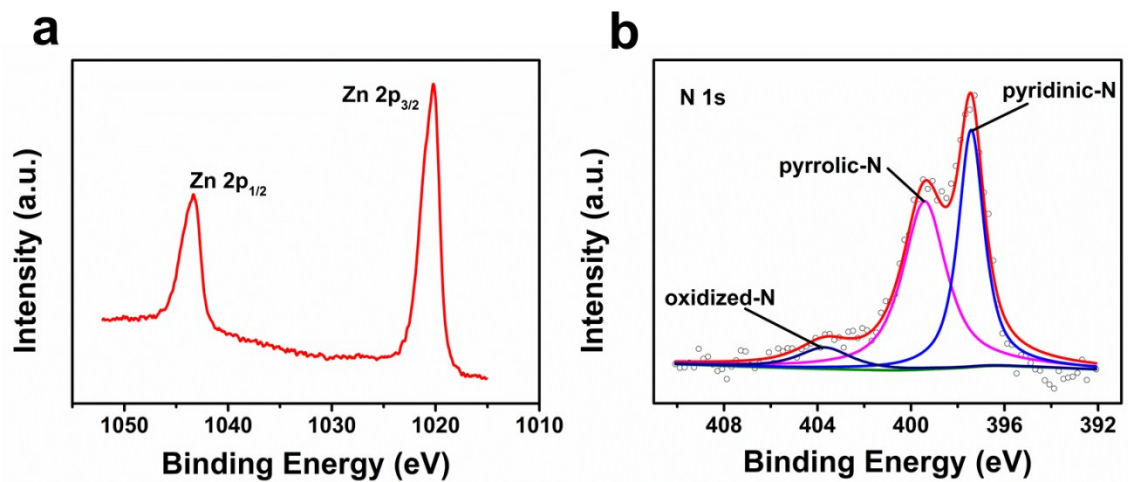

**Fig. S5** High-resolution deconvoluted Zn 2p (a) and N 1s (b) spectra of  $\text{Ni}_3\text{ZnC}_{0.7-550}$ .

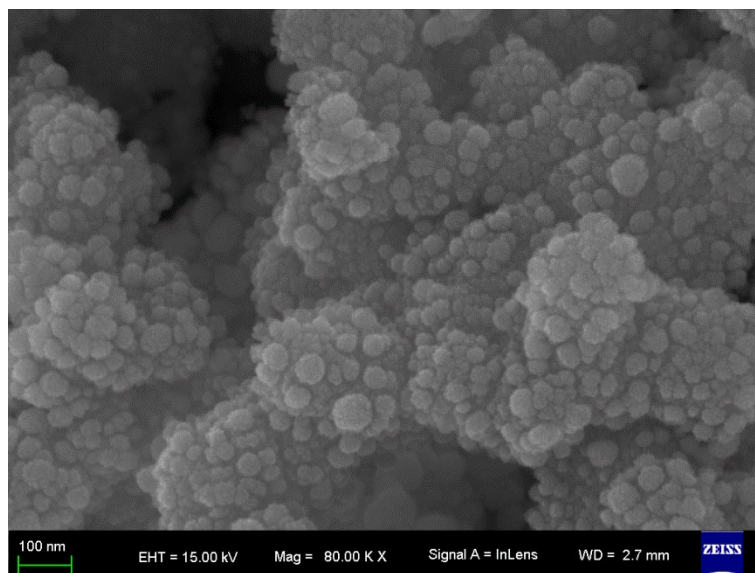

**Fig. S6** SEM image of  $\text{Ni}_3\text{ZnC}_{0.7-550}$ .

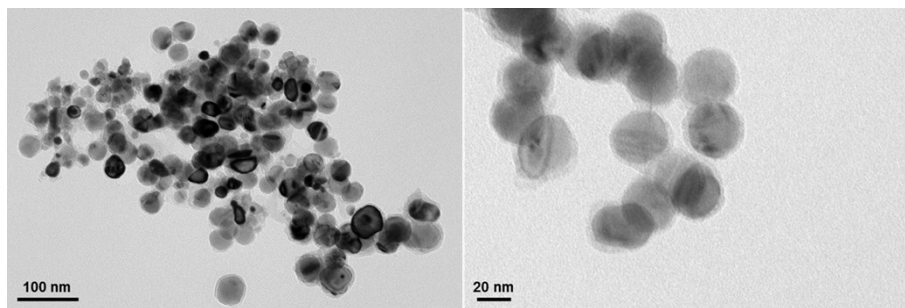

**Fig. S7** TEM images of  $\text{Ni}_3\text{ZnC}_{0.7-650}$ .



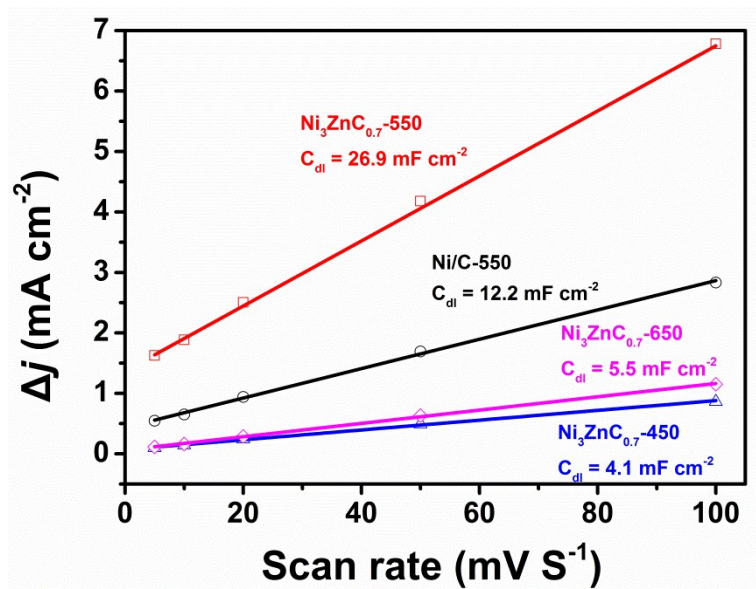

**Fig. S8** The plots of  $\Delta j$  with different scan rates. The double layer capacitance ( $C_{dl}$ ) was estimated from the linear slope.

The ECSA normalized electrocatalytic performance was calculated by setting the ECSA of  $\text{Ni}_3\text{ZnC}_{0.7}\text{-650}$  as 1, so the ECSA of  $\text{Ni}_3\text{ZnC}_{0.7}\text{-550}$  is 4.8. Before ECSA normalization, the needed potential to deliver  $5 \text{ mA cm}^{-2}$  of current density for  $\text{Ni}_3\text{ZnC}_{0.7}\text{-650}$  (-300 mV) is 5 times more negative than that for  $\text{Ni}_3\text{ZnC}_{0.7}\text{-550}$  (-60 mV). This narrowing gap after ECSA normalization (required -153 mV to deliver  $5 \text{ mA cm}^{-2}$  of current density for  $\text{Ni}_3\text{ZnC}_{0.7}\text{-550}$ ) after ECSA normalization highlights the role of ECSA in enhancing electrocatalytic performance.

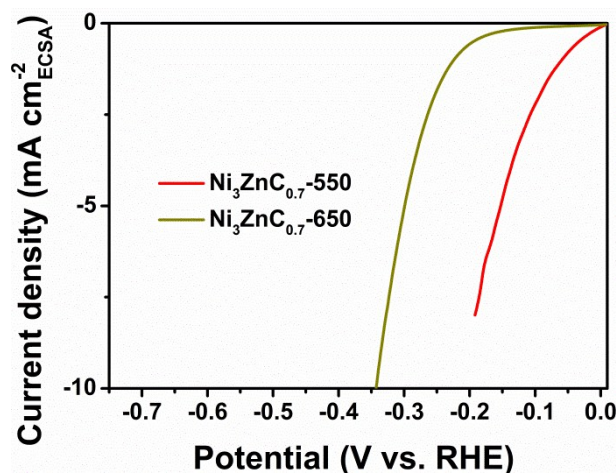

**Fig. S9** Polarization curves of  $\text{Ni}_3\text{ZnC}_{0.7}\text{-550}$  and  $\text{Ni}_3\text{ZnC}_{0.7}\text{-650}$  normalized by the electrochemical active surface area (ECSA).

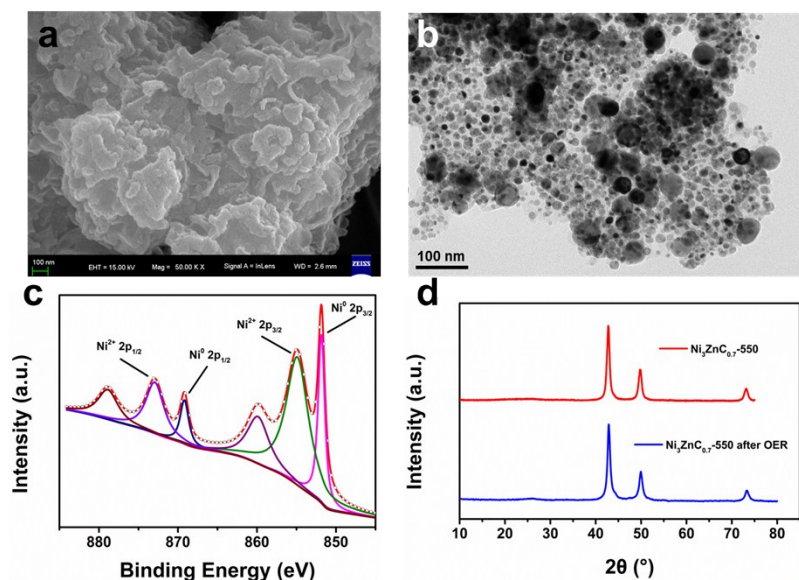

**Fig. S10** (a) SEM and (b) TEM images of  $\text{Ni}_3\text{ZnC}_{0.7}\text{-550}$  after long-term OER stability measurement. (c) XPS result of Ni 2p spectra of  $\text{Ni}_3\text{ZnC}_{0.7}\text{-550}$  after long-term OER stability measurement. (d) XRD patterns of  $\text{Ni}_3\text{ZnC}_{0.7}\text{-550}$  before and after long-term OER stability measurement.

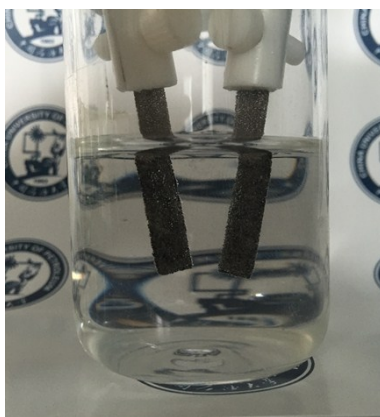

**Fig. S11** Photography of the electrolyte after overall water splitting for 24 h.

**Table S1.** Chemical and texture properties of NiZn-MOF and Ni<sub>3</sub>ZnC<sub>0.7</sub>-550

| Sample                                  | S <sub>BET</sub><br>(m <sup>2</sup> g <sup>-1</sup> ) | D<br>(nm) | V<br>(cm <sup>3</sup> g <sup>-1</sup> ) | C (Atomic<br>%) | N (Atomic<br>%) | Ni (Atomic<br>%) | Zn (Atomic<br>%) |
|-----------------------------------------|-------------------------------------------------------|-----------|-----------------------------------------|-----------------|-----------------|------------------|------------------|
| NiZn-MOF                                | 1107                                                  | 1.8       | 0.51                                    | -               | -               | -                | -                |
| Ni <sub>3</sub> ZnC <sub>0.7</sub> -550 | 140                                                   | 7.1       | 0.26                                    | 70.5            | 3.9             | 7.8              | 2.5              |
| Ni <sub>3</sub> ZnC <sub>0.7</sub> -650 | -                                                     | -         | -                                       | 57.2            | 6.8             | 15.9             | 5.1              |

**Table S2.** Particle sizes of  $\text{Ni}_3\text{ZnC}_{0.7}$  calculated by Scherrer equation<sup>a</sup>

| Samples                              | Particle sizes (nm) |
|--------------------------------------|---------------------|
| $\text{Ni}_3\text{ZnC}_{0.7}$ -550-2 | 10.5                |
| $\text{Ni}_3\text{ZnC}_{0.7}$ -550-6 | 17.1                |
| $\text{Ni}_3\text{ZnC}_{0.7}$ -650-2 | 16.5                |
| $\text{Ni}_3\text{ZnC}_{0.7}$ -650-6 | 28.8                |
| $\text{Ni}_3\text{ZnC}_{0.7}$ -750-2 | 17.6                |

<sup>a</sup> The particle sizes are estimated from  $\text{Ni}_3\text{ZnC}_{0.7}$  (111) peaks using the Scherrer equation:  $D = K\lambda / \beta \cos\theta$ , where  $\lambda$  is the wavelength of the X-ray ( $\lambda = 0.154$  nm),  $K$  is the Scherrer constant and a value of 0.9 is adopted,  $\beta$  is the full width at the half maximum (FWHM) of  $2\theta$  peaks.

**Table S3.** Comparison of the electrocatalytic activity of Ni<sub>3</sub>ZnC<sub>0.7</sub>-550 to recently reported catalysts for HER in basic solution

| Catalyst                                                          | Catalyst loading (mg cm <sup>-2</sup> ) | Electrolyte | $\eta$ at $j = 10$ mA cm <sup>-2</sup> (mV) | Tafel slope (mV dec <sup>-1</sup> ) | Reference                                            |
|-------------------------------------------------------------------|-----------------------------------------|-------------|---------------------------------------------|-------------------------------------|------------------------------------------------------|
| Ni <sub>3</sub> ZnC <sub>0.7</sub> -550                           | ~0.24                                   | 1 M KOH     | 93                                          | 48                                  | this work                                            |
| CoO <sub>x</sub> @CN                                              | 0.12                                    | 1 M KOH     | 232                                         | 115                                 | <i>J. Am. Chem. Soc.</i> <b>2015</b> , 137, 2688     |
| Co-NRCNTs                                                         | 0.28                                    | 1 M KOH     | 370                                         | -                                   | <i>Angew. Chem., Int. Ed.</i> <b>2014</b> , 53, 4372 |
| Ni/CeO <sub>2</sub> -CNT                                          | 0.14 (based on the mass of Ni)          | 1 M KOH     | 91                                          | -                                   | <i>Nano Lett.</i> <b>2015</b> , 15, 7704             |
| NiO/Ni-CNT                                                        | 0.28                                    | 1 M KOH     | 80                                          | 82                                  | <i>Nat. Commun.</i> <b>2014</b> , 5, 4695            |
| Co-P/NC                                                           | 0.28                                    | 1 M KOH     | 191                                         | 51                                  | <i>Chem.Mater.</i> <b>2015</b> , 27, 7636            |
| CP/CTs/Co-S                                                       | 0.32                                    | 1 M KOH     | 190                                         | 131                                 | <i>ACS Nano.</i> <b>2016</b> , 10, 2342              |
| CoP/rGO                                                           | 0.28                                    | 1 M KOH     | 150                                         | 38                                  | <i>Chem. Sci.</i> <b>2016</b> , 7, 1690              |
| Hierarchical NiCo <sub>2</sub> O <sub>4</sub> hollow microcuboids | 1                                       | 1 M NaOH    | 110                                         | 49.7                                | <i>Angew. Chem., Int. Ed.</i> <b>2016</b> , 55, 1    |
| Ni <sub>3</sub> FeN                                               | 0.35                                    | 1 M KOH     | 158                                         | 42                                  | <i>Adv. Energy Mater.</i> <b>2016</b> , 6, 1502585   |
| Ni/NC                                                             | 0.20                                    | 1 M KOH     | 219                                         | 101                                 | <i>ACS Catal.</i> <b>2016</b> , 6, 580               |

**Table S4.** Comparison of the electrocatalytic activity of Ni<sub>3</sub>ZnCo<sub>0.7</sub>-550 to recently reported catalysts for OER in basic solution

| Catalyst                                                          | Catalyst loading (mg cm <sup>-2</sup> ) | Electrolyte | $\eta$ at $j = 10$ mA cm <sup>-2</sup> (mV) | Tafel slope (mV dec <sup>-1</sup> ) | Reference                                          |
|-------------------------------------------------------------------|-----------------------------------------|-------------|---------------------------------------------|-------------------------------------|----------------------------------------------------|
| Ni <sub>3</sub> ZnCo <sub>0.7</sub> -550                          | ~0.24                                   | 1 M KOH     | 320                                         | 52                                  | this work                                          |
| CoO <sub>x</sub> @CN                                              | 1                                       | 1 M KOH     | 260                                         | -                                   | <i>J. Am. Chem. Soc.</i> <b>2015</b> , 137, 2688   |
| Zn <sub>x</sub> Co <sub>3-x</sub> O <sub>4</sub>                  | 1                                       | 1 M KOH     | 320                                         | 51                                  | <i>Chem. Mater.</i> <b>2014</b> , 26, 1889         |
| Co-P/NC                                                           | 0.28                                    | 1 M KOH     | 354                                         | 52                                  | <i>Chem. Mater.</i> <b>2015</b> , 27, 7636         |
| Zn-Co-LDH                                                         | 0.28                                    | 0.1 M KOH   | 520                                         | -                                   | <i>J. Am. Chem. Soc.</i> <b>2013</b> , 135, 17242  |
| CP/CTs/Co-S                                                       | 0.32                                    | 1 M KOH     | 306                                         | 72                                  | <i>ACS Nano.</i> <b>2016</b> , 10, 2342            |
| CoP/rGO                                                           | 0.28                                    | 1 M KOH     | 340                                         | 66                                  | <i>Chem. Sci.</i> <b>2016</b> , 7, 1690            |
| Hierarchical NiCo <sub>2</sub> O <sub>4</sub> hollow microcuboids | 1                                       | 1 M NaOH    | 290                                         | 53                                  | <i>Angew. Chem., Int. Ed.</i> <b>2016</b> , 55, 1  |
| Ni <sub>3</sub> FeN                                               | 0.35                                    | 1 M KOH     | 280                                         | 46                                  | <i>Adv. Energy Mater.</i> <b>2016</b> , 6, 1502585 |
| Ni <sub>0.9</sub> Fe <sub>0.1</sub> /NC                           | 0.20                                    | 1 M KOH     | 330                                         | 45                                  | <i>ACS Catal.</i> <b>2016</b> , 6, 580             |
